# Supplementary material
Source: Elsevier journal article supplement (https://www.sciencedirect.com/science/article/pii/S1134593418300101)
Supplement: mmc1 [file S1134593418300101:mmc1.xlsx]

## Sheet: MEGALISTA
	Autor y año	Referencia	Año	Citado SI/NO	Base	Clasificación	Población de referencia	n	Rango de edad	Grupo	Medición de la RC	VD/instruments/measurements	Resultados	Diseño Transversal/longitudinal	Diseño: Observacional/experimental	Considera grupocontrol (SÍ/NO)
1	Kesler, Adams, Blasey, & Bigler, (2003)	11	2003	NO	P	N	Traumatismo craneoencefálico (TBI)	25	AltoCI: 28.7 (8.9); BajoCI: 23 (8)	2	CI premórbido: ACT Program.	Neuroimagen: iRM (relación ventrículo-cerebro) fue usada como indicador de la magnitud del daño cerebral. Puntaje de Glasgow: severo para todos los participantes.	Los participantes con puntajes de CI más bajos después de la lesión tenían valores de volumen intracraneal menor, independientemente de la severidad de la lesión, y tuvieron un incremento de CI mayor en la recuperación. El volumen intracraneal y la educación predijeron la categoría de CI posterior a la lesión (≥90 o <90). Un mayor volumen intracraneal premórbido y un nivel de educación más alto p…	Longitudinal	Observacional	NO
2	Sumowski, Chiaravalloti, Wylie, & Deluca, (2009)	23	2009	SI	P	N	Esclerosis Múltiple	38	44 (7.5)	1	Inteligencia premórbida: WASI (vocabulary)	Eficiencia en el procesamiento de información y memoria de trabajo: SDMT (versión oral); PASAT (2 segundos). Neuroimagen: iRM (atrofia cerebral: grosor del tercer ventrículo).	La RC predijo una mayor eficiencia en el procesamiento de información, mientras que la atrofia cerebral predijo una deficiencia. La deficiencia en el procesamiento de información se atenúa en los mayores niveles de RC.	Transversal	Observacional	NO
3	Benedict, Morrow, Weinstock, Cookfair, & Schretlen, (2010)	24	2010	SI	P	N	Esclerosis Múltiple	91	44.8 (8.8)	1	Escolaridad: años de escolaridad; Lectura: NAART.	Velocidad y eficiencia de procesamiento: SDMT y PASAT	Las medidas de RC moderaron el grado de disminución de la eficiencia de procesamiento de la información. Los pacientes con baja reserva mostraron declive a lo largo del tiempo, especialmente en el SDMT, mientras que aquellos con alta RC no lo hicieron.	Longitudinal: 2 mediciones (a los 5 años)	Observacional	NO
4	Sumowski, Wylie, Chiaravalloti, & DeLuca, (2010)	25	2010	SI	P	N	Esclerosis Múltiple	44	44.9 (6.9)	1	Enriquecimiento intelectual: WASI (vocabulary)	Aprendizaje verbal y memoria: OT-SRT. Neuroimagen: iRM de alta definición (atrofia cerebral: grosor del tercer ventrículo).	El enriquecimiento intelectual predijo una mejor capacidad de aprendizaje, aunque los resultados son moderados por el nivel de atrofia cerebral.	Transversal	Observacional	NO
5	Sumowski, Wylie, Deluca, & Chiaravalloti, (2010)	26	2010	NO	P	N	Esclerosis Múltiple	18	43.8 (7)	1	Enriquecimiento intelectual: WASI (vocabulary).	Estatus cognitivo: SDMT (versión oral). Neuroimagen: iRM (atrofia cerebral: grosor del tercer ventrículo); RMf (señal BOLD N-Back).	Se requiere un mayor nivel de atrofia para que los pacientes con mayor enriquecimiento intelectual tengan una disminución cognitiva comparable a la de los pacientes con menor nivel de enriquecimiento. Esto sugiere que en la atrofia cerebral, una mayor RC protege a los individuos contra el deterioro cognitivo.	Transversal	Cuasi-experimental	NO
6	Sumowski, Wylie, Gonnella, Chiaravalloti, & Deluca, (2010)	27	2010	SI	P	N	Esclerosis Múltiple	36	45.1 (7.1)	1	Actividades cognitivas de esparcimiento premórbidas: cuestionario sobre las actividades realizadas antes del desarrollo de la EM.	Estatus cognitivo: Velocidad de procesamiento SDMT versión oral; Memoria: OT-SRT; Neuroimagen: iRM de alta definición (atrofia cerebral: grosor del tercer ventrículo).	Relación positiva entre las actividades cognitivas de esparcimiento premórbidas y el estatus cognitivo después de controlar la atrofia cerebral.	Transversal	Observacional	NO
7	Schwartz, Quaranto, Healy, Benedict, & Vollmer, (2013)	28	2013	SI	P/S	N	Esclerosis Múltiple	859 (Baja-Pasiva/Baja-Activa: 230; Alta-Pasiva/Baja-Activa: 178; Baja-Pasiva/Alta-Activa: 184; Alta-Pasiva/Alta-Activa: 235)	Baja-Pasiva/Baja-Activa: 55.5 (8.3); Alta-Pasiva/Baja-Activa: 52.6 (9.4); Baja-Pasiva/Alta-Activa: 55.8 (9.3); Alta-Pasiva/Alta-Activa: 53.9 (9.5)	1	Reserva pasiva: S-PCEMPR. Reserva activa: SLAMAR;	Niveles de discapacidad: SID-SSF; Discapacidad neurológica percibida: The Performance Scales.	Los participantes con mayores puntuaciones de RC activa presentaron menor carga sintomática que aquellos con menores puntuaciones. La RC se asoció con el curso de la enfermedad, los pacientes con actividad alta sobrerepresentaban al grupo de remitente-recurrente y representaban poco al grupo de enfermedad progresiva. Se encontró una asociación entre la RC y el tiempo de movilidad, fatiga y discap…	Longitudinal: seguimiento 6 años	Observacional	NO
8	Feinstein, Lapshin, O’Connor, Lanctôt, & Lanctot, (2013)	29	2013	SI	P	N	Esclerosis Múltiple	Deterioro cognitivo: 46, Sin deterioro: 53, Cognitivamente por debajo de lo predicho: 45	Deterioro cognitivo: 47.0 (10.0), Sin deterioro: 48.0 (8.6); Cogn por debajo de lo predicho: 45.1 (12.3)	1	CI premórbido: AMNART; Escolaridad: años de escolaridad.	Velocidad de procesamiento: PASAT, SDMT; Memoria verbal y visual: CVLT-II, BVMT-R; Función ejecutiva: D-KEFS; Procesamiento Espacial: JLO; Fluidez Verbal: COWAT.	La inteligencia verbal premórbida puede compensar en parte los efectos nocivos de la esclerosis múltiple en la cognición. Los hallazgos se refieren a un continuo en el funcionamiento cognitivo, con RCs que median muchos tonos de gris que se pueden encontrar ocupando esa zona intermedia entre puntuaciones psicométricas consideradas intactas y alteradas.	Transversal	Observacional	NO
9	Schwartz, Snook, Quaranto, Benedict, & Vollmer, (2013)	30	2013	NO	P	N	Esclerosis Múltiple	1142	54.4 (9.2)	1	Reserva pasiva: S-PCEMPR. Reserva activa: SLAMAR; GLTEQ	Discapacidad neurológica percibida: The Performance Scales; Discapacidad percibida: PDDS; Medidas generales: PDQ; SF-12v2; RPW-B; DSLS.	Mayores puntuaciones en la reserva (pasiva y activa) se asocian con mejores resultados en las mediciones genéricas y específicas de la enfermedad, incluyendo menores niveles de percepción de discapacidad, mayores niveles de la medida funcional de salud y mayores niveles de bienestar eudemónico.	Transversal	Observacional	NO
10	Sumowski et al., (2013)	31	2013	SI	P	N	Esclerosis Múltiple	62	43.7 (11.1)	1	Actividades cognitivas de esparcimiento premórbidas: cuestionario sobre las actividades realizadas antes del desarrollo de la enfermedad. Escolaridad: años de escolaridad.	Estatus cognitivo: Eficiencia cognitiva utilizando SDMT (versión oral); Memoria usando STR. Neuroimagen: iRM (atrofia cerebral).	Se encontró una relación positiva entre estatus cognitivo y educación, después de controlarse el factor de reserva cerebral (también analizado en este estudio). Se encontró una relación positiva entre actividades de esparcimiento y estatus cognitivo.	Transversal	Observacional	NO
11	Sumowski et al., (2014)	32	2014	SI	P	N	Esclerosis Múltiple	40	43.85 (10.6)	1	Enriquecimiento intelectual: Escalas Wechsler (vocabulary)	Eficiencia cognitiva: SDMT (version oral); PASAT (3 Segundos). Memoria: STR. Neuroimagen: iRM (progresión de la enfermedad)	El enriquecimiento intelectual se asoció con el nivel de declive cognitivo presentado por los pacientes con respecto a la eficiencia cognitiva y la memoria. La eficiencia cognitiva disminuyó en mayor medida en los pacientes con un bajo enriquecimiento intelectual, mientras que en los pacientes con niveles altos de enriquecimiento, el declive fue moderado.	Longitudinal: seguimiento 4.5 años	Observacional	NO
12	Pinter et al., (2014)	33	2014	SI	P	N	Esclerosis Múltiple	Síndrome clínico aislado: 33; Esclerosis múltiple remitente recurrente: 92; Esclerosis múltiple secundaria progresiva: 12	Síndrome clínico aislado: 34.6 (10.1); Esclerosis múltiple remitente recurrente: 35.9 (10); Esclerosis múltiple secundaria progresiva: 44.4 (7.3)	1	Escolaridad: años de escolaridad	Cognición general: BRB-N; Aprendizaje y memoria verbal: SRT; Aprendizaje visoespacial: 10/36 SpRT; Velocidad de procesamiento: SDMT; Atención sostenida y concentración: PASAT; Fluidez verbal semántica: WLG; Neuroimagen: iRM (pérdida de volumen global y dilatación del tercer ventrículo)	Más años de escolaridad predijeron mejor cognición. También se observó que los efectos negativos de las lesiones en T2 y la atrofia regional cerebral fueron moderados por los años de escolaridad.	Transversal	Observacional	NO
13	Sandry & Sumowski, (2014)	34	2014	SI	P	N	Esclerosis Múltiple	70	48.84 (9.49)	1	Enriquecimiento intelectual: WTAR, PPVT	Memoria verbal a largo plazo: HVLT, WMS (LM); Memoria de trabajo: WAIS-IV (DS)	El enriquecimiento intelectual predijo la memoria verbal a largo plazo y la capacidad de memoria de trabajo. A su vez la memoria de trabajo predijo la memoria verbal a largo plazo y fue una variable mediadora de la relación entre el enriquecimiento intelectual y la memoria verbal a largo plazo.	Transversal	Observacional	NO
14	Modica et al., (2015)	35	2015	NO	P	N	Esclerosis Múltiple	71	46.1 (8.6)	1	Escolaridad: años de escolaridad	Neuroimagen: iRM (volumen de materia gris subcortical); Velocidad de procesamiento: SDMT; Memoria verbal: CVLT; Memoria visual: BVMT-R	Los pacientes con baja RC presentaron peor desempeño en velocidad de procesamiento. Los cambios de la materia gris subcortical predicen el desempeño en velocidad de procesamiento en pacientes con baja RC.	Longitudinal: línea base y a los 3 años	Observacional	SÍ: 23 controles
15	Chillemi et al., (2015)	36	2015	SI	P	N	Esclerosis Múltiple	29	43.7 (13.05)	1	CRC: CRIq	Memoria: RAVLT; Memoria visoespacial: ROCF; Atención visual: TMT-A, TMT-B; Funcionamiento ejecutivo: p-VFT y FVs; Flexibilidad cognitiva y velocidad de procesamiento: SCWT.	Los pacientes con Esclerosis Múltiple y con RC inferior tienen un peor rendimiento neuropsicológico y un procesamiento más lento de la velocidad de la información.	Transversal	Observacional	NO
16	Martins Da Silva et al., (2015)	37	2015	SI	P	N	Esclerosis Múltiple	419	AltaRC: 36 (?) rango:16-65; BajaRC: 43 (?) rango: 24-71.	1	Escolaridad: nivel educativo con 2 niveles (Bajo: ≤ 9 años o Alto: > 9 años). La escolaridad fue el indicador de RC	Evaluación neurológica: EDSS, MSSS; MMSE; Atención y Memoria: Attentive Matrices-AM, DS; Corsi Block-Tapping Test; AVLT (recuperación inmediata y a los 30 minutos y con reconocimiento a los 30 minutos); Sentence Repetition, LWF, WCST; Evaluación de Ansiedad y Depresión: HADS; HLA-DRB1; Estudios genéticos: polimorfismos de ApoE	Los pacientes con más años de educación tenían menos probabilidades de presentar déficits cognitivos que los que tenían menos años, incluso cuando se controlaron otras covariables. Otros factores de predicción significativos del déficit cognitivo fueron: edad, EDSS, MSSS y el curso progresivo de la enfermedad.	Transversal	Observacional	SÍ: 159 controles sanos
17	Pastò et al., (2016)	38	2016	SI	P	N	Esclerosis Múltiple	Con deterioro cognitivo: 14, Sin deterioro cognitivo: 34	Con deterioro cognitivo: 14.7 (3.1); Sin deterioro cognitivo: 15.5 (2.3) rango: 8.8-17.9	1	CI: WISC-R	Aprendizaje verbal: Rao's BRB (SRT); Aprendizaje visoespacial: RBRB (Spatial Recall Test); Atención sostenida y concentración: SDMT, TMT-A, TMT-B; Lenguaje expresivo: VFT, ODT; Lenguaje receptivo: Token Test, NEAPCT (Indication of Pictures); Depresión y fatiga: CDI	En la línea base el 29.2% de los pacientes presentó déficit cognitivo. Se observó deterioro en el desempeño cognitivo en las evaluaciones posteriores en el 37.6% de los pacientes. En los sujetos que estaban cognitivamente conservados en la línea base, alta RC predijo mejoría o estabilidad en el desempeño cognitivo posterior.	Longitudinal: línea base, 2 años y 5 años	Observacional	SÍ: 57 controles
18	Luerding, Gebel, Gebel, Schwab-Malek, & Weissert, (2016)	39	2016	SI	P	N	Esclerosis Múltiple	128	48 (?) rango: 20 - 86	1	Escolaridad: años de escolaridad, certificados obtenidos; Ocupación: Grado vocacional, Independencia y Razonamiento; Actividad física: Tipo de ejercicio, Tiempo dedicado, Regularidad; Actividades de lectura: Tipo de lectura , Tiempo dedicado.	Funciones cognitivas básicas: WAIS-R (Information, Comprehension, Similarities, DSC, Picture completion, Block design); Atención: WAIS-R (DSC), TMT-B, TAP, Ruff 2 & 7; Funciones ejecutivas: WAIS-R (Similarities, Block design, Picture completion, Digit symbol test); Construcción y percepción visual: TMT-A, HAWIE-R (Picture completion), WAIS-R (Block design), RCFT copy; Memoria y aprendizaje: WAIS-…	En los 6 dominios de habilidades cognitivas evaluados, el deterioro cognitivo de los pacientes con esclerosis múltiple estuvo positivamente influenciado por la RC. El grupo con menor tiempo de educación formal podría beneficiarse de otros factores de la RC más que el grupo con más tiempo de educación formal. En otras palabras, la ventaja de más años de educación formal puede ser contrarrestada po…	Transversal	Observacional	NO
19	Sandry, Paxton, & Sumowski, (2016)	40	2016	SI	P	N	Esclerosis Múltiple	45	47.8 (8.5)	1	Inteligencia: WTAR; Habilidad matemática: WJ III (Calculation Subtest); Escolaridad: años de escolaridad	Estatus cognitivo: PASAT	La habilidad matemática, la inteligencia y el nivel educativo median el desempeño de los pacientes en el PASAT.	Transversal	Observacional	NO
20	Ghaffar, Fiati, & Feinstein, (2012)	41	2012	SI	P	N	Esclerosis Múltiple	72	43.0 (9.7)	1	CI premórbido: AMNART; Nivel ocupacional (alta y baja, de acuerdo a U.S. Department of Labors)	Velocidad de procesamiento; Memoria; Funciones ejecutivas: MACF in Multiple Sclerosis	Los pacientes con mayor logro ocupacional tuvieron mejor desempeño cognitivo, independientemente de la atrofia cerebral y el IQ premórbido.	Transversal	Observacional	NO
21	Amato et al., (2013)	42	2013	SI	P	N	Esclerosis Múltiple remitente-recurrente	52	39.2 (9)	1	CI premórbido: ART; Actividades de esparcimiento: CRC; Escolaridad: años de escolaridad (Índice de Reserva Cognitiva).	Exploración neurológica: EDSS; Funcionamiento cognitivo: Rao's BRB; Neuroimagen: iRM (volúmenes)	Una mayor RC en individuos con Esclerosis Múltiple puede mediar entre el rendimiento cognitivo y la patología cerebral. La compensación relacionada con RC puede fallar con la progresión del daño. La ventana de oportunidad de tiempo para los enfoques terapéuticos dirigidos a la mejora intelectual muy probablemente yace en las primeras etapas de la enfermedad.	Transversal	Observacional	NO
22	Scarpazza et al., (2013)	43	2013	SI	P	N	Esclerosis Múltiple remitente-recurrente	50 (Baja ocupación-Baja escolaridad: 17; Baja ocupación-Alta escolaridad: 17; Alta ocupación-Alta escolaridad: 16)	39.65 (8.8)	1	Escolaridad: nivel educativo con 2 niveles (Bajo: ≤ 13 años de escolaridad; Alto: > 13 años); Nivel ocupacional (Baja ocupación; Alta ocupación)	Habilidad cognitiva: PASAT	Los pacientes con bajos niveles educativos tuvieron peores ejecuciones en la versión más rápida del PASAT que los sujetos control pareados. Estos hallazgos no se observan en los pacientes con alta escolaridad. El nivel ocupacional no generó diferencias en la ejecución en el PASAT.	Transversal	Observacional	NO
23	Booth et al., (2013)	44	2013	SI	P	N	Esclerosis Múltiple remitente-recurrente	57	42.96 (8.8)	1	Escolaridad: años de escolaridad; Lectura: NAART; Actividades de esparcimiento: SIP.	Índice de Velocidad de Procesamiento: PASAT, SDMT; Neuroimagen: iRM (volúmenes)	Tanto las medidas de RC activa como pasiva contribuyen a la expresión clínica del deterioro cognitivo en la Esclerosis Múltiple. Los pacientes que reportaron una menor actividad recreativa demostraron una relación significativa entre el funcionamiento neurocognitivo y la atrofia cerebral, mientras que aquellos que mantuvieron sus actividades recreativas no mostraron dicha relación.	Transversal	Observacional	SÍ: 27 controles
24	Sumowski, Chiaravalloti, Leavitt, & Deluca, (2012)	45	2012	SI	P	N	Esclerosis Múltiple secundaria progresiva	25	49.2 (6.7)	1	Enriquecimiento intelectual: WASI (vocabulary)	Función cognitiva: SDMT (versión oral); PASAT (2 y 3 segundos). Memoria: WMS-R (LM tasks LM-I, LM-II) y el OT-SRT.	Hay interacciones entre el enriquecimiento intelectual y el grupo al predecir las puntuaciones en eficiencia cognitiva y memoria. Los pacientes con Esclerosis Múltiple. Los pacientes con niveles más bajos de enriquecimiento intelectual presentan déficits al compararlos con el grupo control, mientras que los pacientes con niveles altos de enriquecimiento no difieren de la ejecución del grupo contr…	Transversal	Observacional	NO
25	Sumowski, Chiaravalloti, & DeLuca, (2009)	46	2009	NO	P	N	Esclerosis Múltiple	58	46.6 (7.7)	1	CI premórbido: WRAT–3 (subtest de lectura).	Eficiencia en el procesamiento de información sencilla: SDMT (versión oral); compleja: PASAT (2 y 3 segundos); aprendizaje verbal y memoria: WMS-R (LM tasks LM-I, LM-II).	Se encontraron interacciones significativas entre Grupo y RC en la eficiencia del procesamiento de información compleja y en aprendizaje verbal y memoria. Los pacientes con menores niveles de RC presentaron díficits en estas funciones comparados con los sujetos sanos sólo en los niveles bajos de RC.	Transversal	Observacional	NO
26	Montuschi et al., (2015)	47	2015	NO	P	N	Esclerosis lateral amiotrófica	Cognición normal: 91, Demencia frontotemporal: 23, Deterioro cognitivo ejecutivo: 36, Deterioro cognitivo no ejecutivo: 10, Deterioro conductual: 11, Deterioro cognitivo no clasificable: 11, Enfermedad de Alzheimer: 1	Cognición normal: 65.9 (10.6); Demencia frontotemporal: 69.1 (7.7.); Deterioro cognitivo ejecutivo: 70 (7.4); Deterioro ejecutivo no cognitivo: 64.9 (12.8); Deterioro conductual: 68.1 (9.9); Deterioro cognitivo no clasificable: 61.9 (9.5)	1	Escolaridad: años de escolaridad	Funciones ejecutivas: WCST, TMT-A, TMT-B, SCWT, VFT; Memoria: WMS-II; Funciones visoespaciales: ROCF; Lenguaje: Token Test; Cognición general: MMSE, WAIS, RPCM, FAB	Los pacientes que presentaron el perfil cognitivo de demencia frontotemporal (12.6%) tenían poca escolaridad, a diferencia de los pacientes sin deterioro cognitivo (49.7%) o con deterioro cognitivo que correspondía a otro perfil: déficit cognitivo ejecutivo (19.7%), déficit cognitivo no ejecutivo (5.5%) déficit conductual (6%) o déficit cognitivo no clasificable (6%).	Transversal	Observacional	SÍ: 127 controles
28	Sanchez, Rodriguez, & Carro, (2002)	48	2002	NO	P	N	Enfermedad de Parkinson	Enfermedad Parkinson: 33 (Alta RC: 13; Baja RC 20)	Enfermedad Parkinson: 69.73 (6.01)	1	Escolaridad: nivel educativo con 2 niveles (Bajo: ≤ 8 años; Alto: > 8 años); Nivel ocupacional (Baja ocupación / alta ocupación); CI premórbido: WAIS (Vocabulario)	Cognición general: MMSE; WAIS; Memoria: WAIS (DS), RAVLT, BVRT; Habilidades visoespaciales, visoconstructivas y visoperceptuales: WAIS (Block Design, Object Assembly), ROCF (Copia); Funciones ejecutivas: WCST, TMT-A, TMT-B	Los pacientes con diagnóstico de Parkinson que tenían mayor RC alcanzaron un nivel más elevado de ejecución en las pruebas neuropsicológicas que los pacientes con RC baja.	Transversal	Observacional	SÍ; 46 sujetos adultos mayores sanos (Alta RC: 14; Baja RC: 32)
29	dos Santos et al., (2010)	49	2010	SI	P	N	Enfermedad de Parkinson	21	69.92 (2.37)	1	Escolaridad: años de escolaridad	Inteligencia general: WAIS-III; Funciones ejecutivas: WCST; Memoria: Tarea diseñada con instrucción de Asociación e Instrucción No asociativa.	Los pacientes con Enfermedad de Parkinson mostraron un rendimiento comparable al del grupo de control en la subprueba de vocabulario y WCST. A diferencia de los controles, los pacientes con Enfermedad de Parkinson no pudieron aprovechar la instrucción de codificación asociativa, que también tuvo un efecto perjudicial en el reconocimiento de elementos.	Transversal	Observacional	SÍ: 22 controles
30	Koerts, Tucha, Lange, & Tucha, (2013)	50	2013	SI	P	N	Enfermedad de Parkinson	48	62.8 (8.5)	1	CI premórbido: NART; Escolaridad: nivel educativo (DES).	Severidad de síntomas motores: UPDRS (parte III; Duración de la enfermedad, Edad de inicio, Puntaje LEDD; Funciones ejecutivas: SCWT, TMT-B; Memoria de trabajo: WMS-R (DS Backward) y VFT; Memoria verbal a largo plazo: RAVLT; Memoria verbal de corto plazo: WMS-R (DS Forward); Velocidad psicomotriz: TMT-A, Stroop Word Card.	La RC protege del deterioro producido por la enfermedad de Parkinson. Los pacientes con capacidad intelectual alta y precoz muestran menos alteraciones cognitivas que los pacientes con baja capacidad premórbida.	Transversal	Observacional	NO
31	Lucero et al., (2015)	51	2015	SI	P/S	N	Enfermedad de Parkinson	155	68.0 (8.5)	1	Escolaridad: nivel educativo	Diagnóstico de demencia: CDR; MMSE	Los pacientes con Parkinson de mayor nivel educacional (más de 16 años) mantienen mejores funciones cognitivas en presencia de patología B-amiloide.	Transversal	Observacional	NO
32	Armstrong et al., (2012)	52	2012	SI	P	N	Enfermedad de Parkinson con deterioro cognitivo leve.	119	71 rango: 67-75	1	CI premórbido: WTAR; Escolaridad: años de escolaridad	Atención: WMS-III (DS); Funciones ejecutivas: TMT, D-KEFS, SCWT, VFT, VVT; Memoria de Trabajo: WMS-III (LNS); Visoespacial: JLO; Aprendizaje y Memoria: RT, CVLT-II; Estado cognitivo: MMSE	La educación superior y el coeficiente intelectual se asociaron con una menor probabilidad de Enfermedad de Parkinson con deterioro cognitivo leve (EP-DCL) en el análisis univariado. En el análisis multivariable, un CI más elevado se asoció con una probabilidad significativamente menor de PD-MCI, pero la educación no.	Transversal	Observacional	NO
33	Liozidou, Potagas, Papageorgiou, & Zalonis, (2012)	53	2012	NO	P	N	Enfermedad de Parkinson sin Demencia	73	61.18 (9.05)	1	Edad; Escolaridad: años de escolaridad; CI Total: WAIS.	Funciones Ejecutivas: WCST (number of categories completed, total number correct, perseverative errors, conceptual level responses).	Una menor edad, mayor educación y mayor nivel de inteligencia están relacionados con un mejor desempeño en el WCST.	Transversal	Observacional	SÍ: 48 controles
34	Bonner-Jackson et al., (2013)	54	2013	SI	P	N	Enfermedad de Huntington	821	41.28 (10.35)	1	CI premórbido: AMNART, NART, WAT; Escolaridad: años de escolaridad; Ocupación.	Inhibición: SCWT; Velocidad de procesamiento: SDMT, TMT-A, TMT-B; Neuroimagen: iRM (volumen intracraneal)	Una mayor RC se asoció significativamente a una tasa de cambio más lenta en una medida cognitiva (TMT-B) y una menor tasa de pérdida de volumen en dos estructuras cerebrales (caudado, putamen) para quienes se estima más cercanos al inicio de la enfermedad motora.	Longitudinal: En la evaluación de la cognición: Línea base y anualmente 6 visitas de seguimiento; Neuroimagen: Línea base (visita 1) y dos evaluaciones más (visitas 3 y 5)	Observacional	NO
35	Zieren et al., (2013)	55	2013	SI	P	N	Arteriopatía cerebral autosómica dominante con infartos subcorticales y leucoencefalopatía	247 portadores de la mutación NOTCH3	49.6 rango: 24-75	1	Escolaridad: años de escolaridad	Velocidad de procesamiento: TMT-A y TMT-B, WAIS-R (Block Design); Funciones ejecutivas: VFT, WAIS-R (DS, Similarities); Memoria verbal: FCSRT (Free Recall and Delayed Recall); Neuroimagen: iRM (volumen cerebral normalizado y volumen de lesión lacunar).	La educación tuvo un impacto independiente en la habilidad cognitiva en pacientes con patología cerebral leve y moderada, pero no en los pacientes con patología severa.	Transversal	Observacional	NO
36	Adell-Serrano et al., (2013)	56	2013	NO	S	N	Enfermedad Vascular Cerebral	36	65.56 (13.2)	1	CRC: Cursos de formación, Ocupación, Formación musical, Idiomas, Lectura y juegos intelectuales; Escolaridad: años de escolaridad, Nivel educativo de los padres.	Estado cognitivo: MMSE	Existe relación entre RC y Deterioro Cognitivo. La probabilidad de tener Deterioro Cognitivo severo es 5 veces mayor cuando la RC es baja y aumenta en 1.1 por año de edad.	Transversal	Observacional	NO
37	Ojala-Oksala et al., (2012)	57	2012	SI	P	N	Enfermedad Vascular Cerebral: isquémica	395	72 (11)	1	Escolaridad: años de escolaridad	Cognición general: MMSE; Funciones ejecutivas; Memoria; Lenguaje; Funciones visoespaciales y constructivas; Neuroimagen: iRM (lesiones en sustancia blanca)	Una historia escolar larga se relacionó con menor frecuencia de disfunción ejecutiva, menor deterioro en memoria, funciones visoespaciales y constructivas y cognición general. También se relacionó con sobrevida favorable después del EVC.	Longitudinal: se realizaron varias evaluaciones (no se especifican cuántas) en un periodo de 12 años	Observacional	NO
38	Alladi et al., (2016)	58	2016	SI	P	N	Enfermedad Vascular Cerebral: isquémica	Monolingües: 255, Bilingües: 353	Monolingües: 56.6 (12.2); Bilingües: 57 (12.7)	1	Bilingüismo: se definió como la capacidad de comunicarse en 2 o más idiomas en interacción con otros hablantes.	Cognición: ACE-R; NeuroCognición: CDeRS; Neuroimagen: TAC y iRM	El bilingüismo es un predictor independiente del deterioro cognitivo después del accidente cerebrovascular.	Transversal	Observacional	NO
39	Piazzini et al., (2006)	59	2006	NO	S	N	Epilepsia del lóbulo temporal	50	37.2 (12.1) rango: 18-60	1	Escolaridad: años de escolaridad	Inteligencia no verbal: RPCM; Atención y velocidad psicomotora: TMT-A, TMT-B; Fluidez verbal: VFT; Comprensión oral del lenguaje: Token Test; Memoria verbal a corto plazo: DS; Memoria verbal a largo plazo: ST, PAWT; Memoria visual a largo plazo: ROCF	Los pacientes mostraron déficit en atención y velocidad psicomotora en la evaluación posterior de 5 años en comparación con el grupo control. El análisis de regresión mostró que los factores que contribuyen al deterioro son la duración de la epilepsia, edad de aparición de la enfermedad, historia de ataques tónico-clónicos y bajo nivel educativo.	Longitudinal: línea base y a los 5 años	Observacional	SÍ: 50 controles
40	Santamarina & Corral, (2009)	60	2009	SI	P/S	N	Epilepsia del lóbulo temporal	Ambos pacientes: Baja RC: 15; Alta RC: 13	Baja RC: 63.40 (6.32); Alta RC: 31.54 (7.94)	1	Escolaridad: nivel educativo (Bajo: estudios primarios; Alto: estudios medios y superiores); Nivel ocupacional (Bajo: obrero manual, empleado no cualificado, autoempleado; Alto: estudiante, empleado cualificado, directivo); CI premórbido: WAIS (Vocabulario)	Rendimiento neuropsicológico: WAIS (Dígitos, Aritmética, Claves y Números y Cubos); RAVLT, BVRT, ROCF (Copia y memoria), Evocación categorial y fonética del BT	Los pacientes con baja RC obtuvieron un rendimiento significativamente menor que los pacientes con alta RC en memoria verbal, atención, visoconstrucción y fluidez fonética y semántica.	Transversal	Observacional	NO
41	Parente, Manfredi, Villani, Franceschetti, & Giovagnoli, (2013)	61	2013	NO	P	N	Epilepsia del lóbulo temporal	Epilepsia del lóbulo temporal derecho: 41, Epilepsia del lóbulo temporal izquierdo: 67	Epilepsia del lóbulo temporal derecho: 37.56 (12.04); Epilepsia del lóbulo temporal izquierdo: 38.90 (12.98)	1	Escolaridad: años de escolaridad	Atención; Reconocimiento visual; Memoria espacial; Categorización y cambio de estímulos visoespaciales; Comprensión verbal; Velocidad y coordinación visomotora; Atención dividida; Iniciativa y búsqueda léxica; Praxias constructivas; Memoria verbal y visoespacial; Razonamiento abstracto; Planeación visoespacial; Span de memoria verbal; Cognición general: CET, ROCF, RPCM, AM, TMT-A, TMT-B; VFT, WST…	Los pacientes con epilepsia del lóbulo temporal derecho presentaron peor desempeño cognitivo general y menos años de escolaridad en comparación con los pacientes con epilepsia del lóbulo temporal izquierdo y sujetos control. Los errores de la evaluación cognitiva general se relacionaron con la escolaridad independientemente del lado del foco epiléptico.	Transversal	Observacional	SÍ: 51 controles
42	Gomez-Beldarrain et al., (2016)	62	2016	NO	P	N	Migraña [crónica y episódica]	crónica:18; episódica:19	Crónica:43.78 (7.91); Episódica: 41.37 (7.86)	1	Nivel educativo de los padres; Escolaridad: años de escolaridad; Ocupación; Cursos; Lenguajes hablados; Hábitos de lectura; Educación musical; Actividades recreativas con demanda intelectual.	CI: WAT; Calidad de Vida: MSQoL; Deterioro asociado a dolor de cabeza: MIDAS; Ansiedad: BAI; BDI; Dependencia a medicamentos: MDQ-H; Neuroimagen: iRM, DTI y ROIs (volumen, anisotropía)	Los pacientes con mayor RC tenían mayor anisotropía fraccional en ínsula anterior derecha y cíngulo bilateral (regiones asociadas a modulación del dolor); esto sugiere que la RC (años de educación formal, nivel de alfabetización, estado ocupacional y participación en actividades intelectuales de ocio) influye positivamente en las redes cerebrales, disminuyendo el impacto de los efectos negativos …	Longitudinal	Observacional	SÍ: 15 controles
43	Gomez-Beldarrain, Anton-Ladislao, Aguirre-Larracoechea, Oroz, & Garcia-Monco,	63	2014	NO	P	N	Migraña [crónica y episódica]	Crónica: 18; Episódica: 22	Crónica: 43.78 (7.91); Episódica: 41.82 (7.65)	1	Nivel educativo de los padres; Escolaridad: años de escolaridad; Ocupación; Cursos; Lenguajes hablados; Hábitos de lectura; Educación musical; Actividades recreativas con demanda intelectual.	CI: WAT; Calidad de Vida: SF-36 y MSQoL; Deterioro asociado a dolor de cabeza: MIDAS; Ansiedad: BAI; Depresión: BDI; Dependencia a medicamentos: MDQ-H	Una baja RC estuvo relacionada con deterioro de calidad de vida, ansiedad, depresión, dependencia a drogas y uso excesivo de medicamentos para la migraña.	Transversal	Observacional	SÍ: 15 controles
44	Salmond, Menon, Chatfield, Pickard, & Sahakian, (2006)	64	2006	NO	P	N	Traumatismo craneoencefálico	Con depresión: 13; Sin depresión: 30	No se especifica	1	CI premórbido: NART	Depresión: BDI; Calidad de vida: SF-36	Se encontró diferencia significativa entre el grupo con depresión y el grupo sin depresión. Mayor inteligencia se asoció con menor proporción de depresión.	Transversal	Observacional	NO
45	Fuentes, McKay, & Hay, (2010)	65	2010	SI	P	N	Traumatismo craneoencefálico	52	11.81 (3.13)	1	CI premórbido: WIAT-II (subtest de lectura de palabras, WISC-IV (vocabulary).	Atención sostenida y dividida: TEA-Ch; Velocidad de procesamiento visual-motor: WISC-IV (Processing Speed Index score, DSC Scaled Score y Symbol Search Scaled Score); Aprendizaje y memoria: CVLT-C, ROCF (Immediate Recall T-score y Delayed Recall T-score); Funcionamiento ejecutivo: WCST, CCT.	No hubo correlaciones significativas entre las medidas del CI verbal y las puntuaciones neuropsicológicas posteriores a la lesión, lo que sugiere que estas habilidades no son indicadores válidos de la RC en la población pediátrica con traumatismo craneoencefálico.	Transversal	Observacional	NO
46	Rassovsky et al., (2015)	66	2015	SI	P	N	Traumatismo craneoencefálico	89	40.3 (13.55) rango: 19-73	1	Inteligencia premórbida: WAIS-III; Nivel socioeconómico; Actividades de ocio	Funcionamiento intelectual: Ward 7; Aprendizaje y memoria verbal: RAVLT; Aprendizaje y memoria visual: ROCF; Funciones ejecutivas: WCST, VFT; Funcionamiento social: SAQ; Funcionamiento diario: ADL (Home, Mobility); Estado mental: BSI, SCL-90.	La severidad del traumatismo craneoencefálico predijo el funcionamiento cognitivo, social y cotidiano después de la lesión. Ajustando por la severidad de la lesión, el funcionamiento intelectual premórbido predice el estado cognitivo y el funcionamiento ocupacional, social, emocional y cotidiano. Las actividades de ocio premórbidas también predijeron el funcionamiento cognitivo, emocional y cotid…	Transversal	Observacional	NO
47	Sandry, Deluca, & Chiaravalloti, (2015)	67	2015	SI	P	N	Traumatismo craneoencefálico	50	37.78 (11.03)	1	Enriquecimiento intelectual: WTAR, WASI	Memoria verbal a largo plazo: CVLT, PM-MAS (Prose Memory); Memoria de trabajo: WAIS-III (DS, LNS)	Se encontraron correlaciones significativas entre RC, memoria verbal y memoria de trabajo. En los modelos de regresión se encontró significancia entre la relación de RC y memoria verbal, y RC y memoria de trabajo. La regresión entre RC y memoria verbal estaba parcialmente mediada por la memoria de trabajo.	Transversal	Observacional	NO
48	Wright et al.,(2016)	68	2016	NO	P	N	Traumatismo craneoencefálico (jugadores de futbol americano retirados expuestos)	40	46.38 (10.75)	1	CI premórbido: AMNART; Nivel ocupacional; Escolaridad: nivel educativo: máximo grado alcanzado.	Memoria verbal: CVLT–II; Memoria no verbal: ROCF (ensayo inmediato y retrasado); SDMT (oral y escrito); Atención y velocidad de procesamiento: TMT-A; Habilidad ejecutiva: VFT (A-S y animales) y TMT-B. Antecedentes de contusión (frecuencia, severidad y periodo de riesgo de contusión).	El índice conjugado generado con los antecedentes de contusión y la RC predijo la habilidad cognitiva global.	Transversal	Observacional	NO
49	Oldenburg, Lundin, Edman, Nygren-de Boussard, & Bartfai, (2016)	69	2016	SI	P	N	Traumatismo craneoencefálico leve	122	rango: 15-65	1	CI premórbido: WAIS (Información); Escolaridad: nivel educativo; Nivel ocupacional: ISCO	Memoria: SRT; Atención: PASAT; Velocidad de procesamiento: WAIS (DSC), TMT-A,TMT-B; Funciones ejecutivas: SCWT; Memoria de trabajo: WAIS (DS, Block Design)	Los pacientes con baja RC presentaron 4.14 veces más riesgo de desarrollar síntomas post-concusión 3 meses después del TCE.	Transversal	Observacional	SÍ: 35 controles
50	Sumowski, Chiaravalloti, Krch, Paxton, & Deluca, (2013)	70	2013	SI	P/S	N	Traumatismo craneoencefálico moderado/severo	44	39.3 (10.6)	1	Escolaridad: años de escolaridad	Estatus cognitivo: SDMT (velocidad de procesamiento); Memoria de trabajo: LNS; Memoria episódica: SRT.	El logro educativo se relacionó positivamente con el estatus cognitivo en los pacientes. Las discrepancias entre el estatus cognitivo de los pacientes y el grupo control se atenuaban conforme aumentaba el logro educativo en los pacientes.	Transversal	Observacional	NO
51	Fay et al., (2010)	71	2010	SI	P	N	Traumatismo craneoencefálico: Leve	Con complicación: 32; Sin complicación: 150	Con complicación: 12.16 (1.93); Sin complicación: 11.98 (2.27)	1	Inteligencia: WASI	Inteligencia: WASI; Lectura y habilidades de cálculo: WRAT-3; Memoria Verbal: CVLT-C; Habilidades visomotoras: VMI; Memoria de trabajo: CANTAB (Tres subtests Memoria de reconocimiento de patrones, Stokings of Cambridge y Memoria de trabajo espacial).	Los niños con alta capacidad cognitiva y mayor RC pueden estar algo protegidos de los efectos del traumatismo craneoencefálico leve complicado, mientras que aquellos con menos RC (es decir, baja capacidad cognitiva) muestran una mayor vulnerabilidad al desarrollo de síntomas postcontusión (SPC) inmediatamente después y hasta 3 meses después de la lesión .	Transversal	Observacional	NO
52	Anaya et al., (2015)	72	2015	SI	P	P	Trastorno bipolar	224	40.0 (8.9)	1	CI premórbido: WAIS-III (vocabulary), Escolaridad: años de escolaridad, Ocupación.	Atención: TMT-A, CPT-II; Velocidad de procesamiento: WAIS-III (Symbol Search y DSC); Memoria de trabajo: WAIS-III (Arithmetic, Digits Forward y LNS); Memoria visual: ROCF; Memoria verbal: CVLT, WMS (LM); Función ejecutiva: WCST, SCWT, p-VFT.	Una mayor RC se asoció con un mejor funcionamiento cognitivo y un mejor funcionamiento psicosocial.	Transversal	Observacional	NO
53	Grande et al., (2017)	73	2016	SI	P	P	Trastorno bipolar	102	Baja RC: 38.86 (12.16); Alta RC: 41.00 (8.25)	1	CI premórbido: WAIS (vocabulary); Escolaridad: años de escolaridad; Ocupación.	Funciones ejecutivas: WCST, SCWT; Memoria de trabajo: WAIS (Digits backward), TMT-B, COWAT (p-VFT y s-VFT); Evaluación psiquiátrica.	Pacientes bipolares con RC alta tenían más episodios hipomaníacos y depresivos. Pacientes con RC baja tenían más internamientos, más síntomas psicóticos previos y fueron tratados con litio más frecuentemente. Pacientes con alta RC tenían mejores puntajes cognitivos (atención, memoria de trabajo, fluidez verbal, memoria verbal, flexibilidad cognitiva, velocidad de procesamiento).	Transversal	Observacional	SÍ: 32 Sanos
54	Forcada et al., (2015)	74	2015	SI	P/S	P	Trastorno bipolar I-II	52	47.52 (11.9)	1	CI premórbido: WAIS-III (vocabulary); Escolaridad: años de escolaridad; Ocupación; Actividades de esparcimiento.	Funcionamiento ejecutivo y Memoria: TMT-B, WAIS-III (DS Backward), SCWT, CVLT, ROCF; Funcionamiento general: FAST	La RC es predictor del funcionamiento cognitivo y psicosocial en pacientes ambulatorios bipolares eutímicos. Las asociaciones significativas entre la RC y las variables clínicas relacionadas con el curso del trastorno pueden ser indicativas de una manifestación clínica más leve en aquellos con mayor RC.	Transversal	Observacional	SÍ: 29 controles
55	de la Serna et al., (2013)	75	2013	SI	P/S	P	Esquizofrenia	35	15 (1.9)	1	CI premórbido: WAIS-III (vocabulary); Escolaridad: años de escolaridad; Nivel educativo de los padres; Actividades sociales y de esparcimiento	Atención: TMT-A, CPT; Memoria de trabajo: WAIS-III (Digits forward, digit backward, LNS), TMT-B; Memoria y aprendizaje Verbal: TAVEC, CVLT; Flexibilidad cognitiva: WCST, SCWT	La RC fue capaz de predecir la memoria de trabajo y la atención en dos años de seguimiento. Los puntajes más bajos en RC se observaron en esquizofrénicos y la medida de RC clasificó correctamente un alto porcentaje de la muestra en los dos grupos.	Longitudinal: 2 evaluaciones (a los 2 años)	Observacional	SÍ: 98 controles
56	Wang, Ho, Sum, Collinson, & Sim, (2016)	76	2016	NO	S	P	Esquizofrenia	81	30.44 (8.03)	1	CI premórbido: WRAT-RT; Escolaridad: años de escolaridad	DUP: duración del periodo entre el inicio de los síntomas de esquizofrenia y el inicio de tratamiento. Cognición: BACS.	En el grupo de pacientes la inteligencia y la educación predijeron puntuaciones más altas en cognición general. La ejecución de los pacientes en la BACS fue mejor en el grupo con CI premórbido alto en comparación con el grupo de CI bajo. La DUP se asocia con peores ejecuciones en la cognición general y esta relación es más pronunciada en el subgrupo de pacientes con menor CI premórbido.	Transversal	Observacional	NO
57	Amoretti et al., (2016)	77	2016	SI	P/S	P	Psicosis (primer episodio)	52	25.31 (5.96)	1	CI premórbido: subtest WAIS-III (vocabulary); Escolaridad: años de escolaridad; Nivel educativo de los padres; Actividad física; Actividad social; Actividades de esparcimiento (Índice de Reserva Cognitiva).	Atención: CPT-II, Funciones ejecutivas: WCST, TMT-B; Aprendizaje y memoria Verbal: CVLT	La RC predice el resultado neuropsicológico inicial y a largo plazo, los síntomas negativos y el funcionamiento. Además, los resultados muestran que la RC tiene una capacidad mediadora.	Longitudinal: 2 mediciones (a los 2 años)	Observacional	SÍ: 41 controles
58	Pedrero-Pérez et al., (2014)	78	2014	SI	P	P	Adicción a sustancias	Hombres: 40; Mujeres: 17	Hombres: 39.1 (13.2); Mujeres: 44.1 (12.4)	1	CRC	Cognición general: MoCA; Alteraciones frontales: ISP	La RC correlacionó con la cognición general, y con el rendimiento en atención, procesamiento numérico, fluidez verbal y capacidad de abstracción. Elevada RC se relaciona con mejor funcionamiento prefrontal en la vida diaria. La actividad lectora parece ser factor protector del funcionamiento prefrontal.	Transversal	Observacional	NO
59	Keifer et al., (2010)	79	2010	SI	P	P	Anorexia nerviosa	28 mujeres	26.4 (8.7) rango:16-42	1	La RC se estimó mediante una prueba de lectura de palabras	Subtipos de Anorexia Nerviosa (AN): restrictivo y atracón/purga; Neuropsicología: RBANS (Memoria inmediata y a largo plazo, Habilidades visoconstructivas, Percepción visoespacial, Nominación de figuras, Fluidez semántica, Atención auditiva, Velocidad de procesamiento).	Una mayor RC y ser del subtipo atracón/purga se asociaron a una mejor respuesta al tratamiento para la anorexia nerviosa. La RC se asoció a mejoría en memoria verbal, fluidez semántica, atención auditiva y construcción visoespacial.	Longitudinal; hospitalizadas para tratar Anorexia Nerviosa	Observacional	NO
60	McLaren, Szymkowicz, Kirton, & Dotson, (2015)	80	2015	NO	P	P	Depresión (síntomas depresivos)	73	38.49 (22.40) rango: 18 - 81	1	Escolaridad: años de escolaridad	Depresión: CES-D; Ansiedad: STAI-S; Funciones ejecutivas: SCWT; Velocidad de procesamiento: TMT-A, TMT-B; Memoria verbal: HVLT-R	Los sujetos con mayor escolaridad tuvieron mejor desempeño en la prueba de memoria verbal, independientemente de los síntomas depresivos. Los sujetos con pocos años de escolaridad y síntomas depresivos tuvieron bajo desempeño en este dominio. No se observó efecto en funciones ejecutivas y velocidad de procesamiento.	Transversal	Observacional	NO
61	O’Shea et al., (2015)	81	2015	NO	P	P	Depresión (síntomas depresivos)	703	80 (5.5)	1	Escolaridad: años de escolaridad, Nivel de lectura: WRAT, WAT	Funciones ejecutivas; Memoria; Funciones visoespaciales y lenguaje. Depresión: CES-D; Neuroimagen: iRM (volumen cerebral, craneal e hiperintensidad en materia blanca)	Las personas con alta RC presentaron peor desempeño cognitivo en todos los dominios, menos funciones visoespaciales, a medida que los síntomas depresivos aumentaban.	Transversal	Observacional	NO
62	Vázquez-Justo et al., (2014)	82	2014	SI	P	I	VIH con dependencia a opioides	VIH-positivos RC baja: 42; VIH-positivos RC alta: 33; VIH-negativos RC baja: 21; VIH-negativos RC alta: 27	VIH-positivos RC baja: 32 (5.2); VIH-positivos RC alta: 35 (5); VIH-negativos RC baja: 29 (4.5); VIH-negativos RC alta: 29 (4.9)	1	Función premórbida: WAIS (vocabulary); Escolaridad: años de escolaridad	Estado cognitivo en VIH: WAIS (comprensión, semejanzas, dígitos, dígitos y símbolos, diseño con cubos y rompecabezas), AVLT, VSAT, TMT, VFT, BVRT, BNT, SCWT, PP, ROCF, FTT, WCST	La RC alta se asoció con mejores ejecuciones en la mayor parte de las pruebas en los pacientes consumidores seropositivos y seronegativos.	Transversal	Observacional	NO
63	Pereda et al., (2000)	83	2000	NO	P	I	Virus de Inmunodeficiencia Humana: Positivo	VIH baja reserva cognitiva: 50; VIH alta reserva cognitiva: 50	VIH baja reserva cognitiva: 33.1 (4.8); VIH alta reserva cognitiva: 33.9 (7.3) rango: 24-57	1	Cerebral Reserve Score (nivel educativo, vocabulario y ocupación)	Atención: WAIS (DS), TMT-A, TMT-B; Habilidades psicomotoras: WAIS (DSC), CalCap; Memoria: RAVLT, ROCF, BT; Habilidades motoras: GP; Fluidez verbal: VFT; Habilidades visoespaciales y visoconstructivas: ROCF, WAIS (Block Design); Depresión: SCAN, MADRS	Los pacientes con VIH y baja RC mostraron pobre desempeño en las pruebas neuropsicológicas. Los factores asociados con el desempeño neuropsicológico y el deterioro cognitivo fueron mayor edad, baja RC y no estar bajo tratamiento de zidovudina.	Transversal	Observacional	SÍ: Baja reserva cognitiva: 32; Alta reserva cognitiva: 31
64	Morgan et al., (2012)	84	2012	SI	P	I	Virus de Inmunodeficiencia Humana: Positivo	Sin trastorno neurocognitivo asociado con VIH: 53, Trastorno neurocognitivo subsindrómico asociado con VIH: 16, Trastorno neurocognitivo sindrómico asociado con VIH: 17	Sin trastorno neurocognitivo asociado con VIH: 51.2 (11.7); Trastorno neurocognitivo subsindrómico asociado con VIH: 51.3 (10.7); Trastorno neurocognitivo sindrómico asociado con VIH: 46.9 (13.8)	1	Escolaridad: años de escolaridad, CI verbal: WTAR; Nivel Ocupacional: HSOL	Aprendizaje y memoria: CVLT-II, WMS-III (LM), RCFT; Funciones ejecutivas: TMT-B, ToL; Velocidad de procesamiento: TMT- A; Atención y memoria de trabajo: WMS-III (DS), BQSS; Memoria de trabajo: SOPT; Fluidez verbal: VFT; velocidad y coordinación motriz fina: GP	El grupo de pacientes con deterioro neurocognitivo sindrómico asociado con VIH mostró menor RC en comparación con los demás grupos (pacientes cognitivamente normales y con deterioro cognitivo subsindrómico).	Transversal	Observacional	NO
65	Foley et al., (2012)	85	2012	SI	P	I	Virus de Inmunodeficiencia Humana: Positivo	102	49.8 (10.0)	1	CI premórbido: WRAT-3; Escolaridad: años de escolaridad.	Lenguaje: COWAT, BNT; Funcionamiento ejecutivo: TMT-A, SCWT, WAIS-III (DSC y Symbol search); Atención y Memoria de trabajo: PASAT, WAIS-III (LNS); Aprendizaje y Memoria: HVLT-R, BVM-R; Motor fina: GP.	Las personas en riesgo de deterioro cognitivo permanecen intactas cuando muestran niveles más altos de RC, pues ésta actúa como un factor neuroprotector en la prevención del deterioro. Los efectos neuroprotectores combinados de una menor edad y una mayor RC están por encima de los explicados por variables biológicas, psiquiátricas y psicosociales.	Transversal	Observacional	SÍ: 27 controles
66	Cross, Önen, Gase, Overton, & Ances, (2013)	86	2013	SI	P	I	Virus de Inmunodeficiencia Humana: Positivo	Deterioro cognitivo: 209, Sin deterioro cognitivo: 298	Deterioro cognitivo: 44 rango: 38-51, Sin deterioro cognitivo: 41 rango: 30-47	1	Escolaridad: nivel educativo; Ocupación.	Estado cognitivo: IHDS	Los factores de riesgo identificados no estaban relacionados con el VIH y sugieren que los factores ambientales y sociodemográficos tienen un impacto significativo en el funcionamiento cognitivo y deberían recibir más atención.	Transversal	Observacional	NO
67	Patel et al., (2013)	87	2013	SI	P	I	Virus de Inmunodeficiencia Humana: Positivo	Jóvenes: 296, Mayores: 70	Jóvenes: 40.44, Mayores: 53.49 rango: 18-69	1	Habilidad lectora: AMNART; Escolaridad: años de escolaridad	Velocidad de procesamiento:TMT-A, SDMT, DSC; Aprendizaje y memoria: CVLT; Fluidez verbal: VFT; Atención y memoria de trabajo: PASAT; Funciones ejecutivas: TMT-B, SCWT, SCT, WCST; Funcionamiento motor: GP	La RC fue la variable que mostró mayor poder predictivo sobre el funcionamiento cognitivo de pacientes con VIH.	Transversal	Observacional	NO
68	Fazeli et al., (2014)	88	2014	SI	P	I	Virus de Inmunodeficiencia Humana: Positivo	Factor de estilo de vida activo: 0: 38; 1: 51; 2: 30; 3: 20	Factor de estilo de vida activo: 0: 52.3 (9.7); 1: 48.2 (10.9); 2: 47.8 (11.6); 3: 44.5 (7.9)	1	Estilo de vida: ALFs (Se incluye el ejercicio físico, la actividad social y el empleo actual; 3 es el mayor nivel de actividades)	Se evaluaron siete dominios cognitivos comúnmente afectados por el VIH, que incluyen la Fluidez Verbal, Memoria de Trabajo, Velocidad de procesamiento de la información, Aprendizaje verbal y visual y el recuerdo diferido, la Función Ejecutiva y la Función motora	Mientras mayor sea el número de actividades, mejor será el rendimiento neurocognitivo global y habrá una menor prevalencia de los desórdenes neurocognitivos asociados al VIH.	Transversal	Observacional	NO
69	Shapiro, Mahoney, Peyser, Zingman, & Verghese, (2014)	89	2014	SI	P	I	Virus de Inmunodeficiencia Humana: Positivo	116	51.9 ( 14.48)	1	Escolaridad: años de escolaridad; CI premórbido: WTAR [puntuaciones z de años de educación y de Inteligencia premórbida].	Nivel de apatía: AES.	La puntuación compuesta de RC predijo el nivel de apatía, sugiriendo que la RC tiene un efector protector contra la apatía en estos pacientes.	Transversal	Observacional	NO
70	Sheppard et al., (2015)	90	2015	SI	P	I	Virus de Inmunodeficiencia Humana: Positivo	Jóvenes VIH-: 24; Jóvenes VIH+: 27; Mayores VIH-: 39; Mayores VIH+: 56	Jóvenes VIH-: 30.1 (1.3); Jóvenes VIH+: 32.8 (1); Mayores VIH-: 56 (.8); Mayores VIH+: 56.7 (.8)	1	Escolaridad: años de escolaridad; CI verbal: WTAR; Nivel ocupacional: HSOL.	Aprendizaje: WMS-III (LM-I) y CVLT-II (Total Trials 1–5); Memoria con retraso: WMS-III (LM-II) y CVLT-II (long Delay Free Recall trial); Atención: WMS-III (DS) y CVLT- II (Trial 1); Velocidad de procesamiento: TMT-A y TOL (tiempo de ejecución total); Funciones ejecutivas: TMT-B y ToL (total de movimientos); Habilidades motoras: GP (mano dominante y no dominante); Incidencia de desórdenes neurocog…	En el grupo de pacientes con VIH+ de mayor edad, los niveles bajos de RC predijeron la incidencia de desórdenes neurocognitivos en la evaluación de seguimiento.	Longitudinal: seguimiento 14 meses	Observacional	NO
71	Alvarez-Tostado, Inozemtseva, Aguiñiga, López, & Matute, (2015)	91	2015	SI	P	I	Virus de Inmunodeficiencia Humana: Positivo	Estado A: 10, Estado B: 16, Estado C: 8	Estado A: 38.1 (6.9); Estado B: 36.8 (7.5); Estado C: 37.9 (5.1)	1	CI premórbido: WAIS-III (vocabulary); Escolaridad: años de escolaridad; Ocupación	Atención: WAIS-III (symbol search, DSC); Memoria verbal: HUMANS (CVLT); Memoria visual: WMS-R (Visual reproduction); Funciones ejecutivas: D-KEFS (SCWT), TMT-B, WCST; Velocidad de procesamiento: WCST; Nominación: BNT; Construcción visual: WAIS-III (block design); Memoria de trabajo: WAIS-III (LNS)	Hay un efecto de la RC sobre el funcionamiento neuropsicológico de acuerdo con las etapas clínicas de la infección. La comparación entre alta y baja RC en cada estadío clínico reveló que el efecto de la CR fue más fuerte en la etapa B que en las etapas A y C, lo que sugiere una relación no lineal y por ello concuerda con la idea del umbral.	Transversal	Observacional	NO
72	Milanini et al., (2016)	92	2016	SI	P	I	Virus de Inmunodeficiencia Humana: Positivo	60	rango: 62-72	1	CI: BIT; (Índice de RC)	Memoria: RAVLT; Lenguaje: VFT; Atención y funciones ejecutivas: MFTC, WAIS (DSC); Habilidades motoras finas: GP; Memoria de trabajo: WAIS (DS Forward); Depresión: ZSRDS; Funcionalidad: IADL	El Cognitive Reserve Index y el BIT se asociaron con un bajo riesgo de desarrollar deterioro cognitivo. Mayor RC e inteligencia general correlacionaron con mejor desempeño de todas las medidas cognitivas globales y específicas.	Transversal	Observacional	NO
73	Stern et al., (1996)	93	1996	NO	P	I	Virus de Inmunodeficiencia Humana: Positivo (Médicamente asintomáticos)	Alta RC VIH+: 26; Baja RC VIH+: 49; Alta RC VIH-= 36; Baja RC VIH-: 14	Alta RC VIH+: 31.2 (7.4); Baja RC VIH+:28 (5.1); Alta RC VIH-=32.2 (6.8); Baja RC VIH-:29.2 (7.7)	1	Escolaridad: años de escolaridad; Nivel ocupacional; Índice socioeconómico: SCSI; CI: SILS (vocabulario).	Atención y procesamiento de información; Funciones ejecutivas; Función motriz; Lenguaje; Función visoespacial; Aprendizaje y memoria: CBS (orden directo e inverso), 2 & 7 Selective Attention Test, PASAT, WAIS-R (Digit Symbol), TMT-A, TMT-B, COWAT, SCWT, SILS, FTT, GP, BNT, WAIS-R (Block Design), ROCF (copia, recuperación inmediata y recuerdo retrasado) y CVLT.	Los pacientes seropositivos con puntuaciones bajas en RC presentaron déficits significativamente mayores en las funciones de atención y procesamiento de información, aprendizaje verbal y memoria, funciones ejecutivas y habilidades visoespaciales que el grupo de pacientes seropositivos con puntuaciones altas en RC.	Transversal	Observacional	NO
74	Sakamoto et al., (2013)	94	2013	SI	P	I	Hepatitis C	Alta reserva cognitiva: 19; Baja reserva cognitiva: 20	Alta reserva cognitiva: 54.5 (7.7); Baja reserva cognitiva: 50.6 (7.9)	1	Escolaridad: años de escolaridad, CI estimado: WTAR, Funcionamiento intelectual actual: RIST	Atención/memoria de trabajo, aprendizaje, memoria, fluidez verbal, funcionamiento diario: NAB; Funciones ejecutivas: NAB, D-KEFS; Funciones ejecutivas general: BRIEF-A; Depresión BDI	Los análisis de regresión ajustados por género, depresión y consumo de sustancias, mostraron efectos significativos en el grupo con alta RC en fluidez verbal, funciones ejecutivas y funcionamiento diario. Las comparaciones entre grupos mostraron que el grupo con baja RC tuvo un desempeño significativamente menor que el grupo con alta RC.	Transversal	Observacional	SÍ: 40 controles
75	Alosco et al., (2012)	95	2012	SI	P	O	Cardiopatía	157	69.3 (9.3)	1	CI premórbido: AMNART	Atención: TMT-A, DSC, LNS, ARCPT; Funciones ejecutivas: TMT-B, FAB; Memoria: CVLT–II, BNT, s-VFT.	La reserva cognitiva modera la asociación entre la gravedad de la insuficiencia cardíaca y la función cognitiva en múltiples dominios cognitivos.	Transversal	Observacional	NO
76	Patel et al., (2015)	96	2015	SI	P/S	O	Cirrosis	Reserva cognitiva promedio: 64; Reserva cognitiva alta: 54	Reserva cognitiva promedio: 55.3 (8); Reserva cognitiva alta: 56 (5.4)	1	Inteligencia general: Barona Full-Scale IQ	Calidad de vida: SIP	Se diagnosticó encefalopatía hepática encubierta (CHE) en el 49% de los pacientes. Se observó que estos pacientes presentaban más baja RC que los que no tenían la patología. La RC correlacionó con el impacto de la enfermedad y el puntaje psicosocial y físico. Los pacientes con mayor RC presentaron mejor calidad de vida relacionada con la salud. La RC resultó predictora del impacto de la enfermeda…	Transversal	Observacional	NO
77	Sabia et al., (2011)	97	2011	NO	P	O	Consumo de alcohol	Sin consumo: 59; Consumo ocasional: 524; Consumo ligero: 1854; Consumo moderado: 703; Consumo alto: 933	Sin consumo: 59.8 (2.8); Consumo ocasional: 59.4 (2.9); Consumo ligero: 59.4 (2.7); Consumo moderado: 59.6 (2.8); Consumo alto: 59.9 (2.8) rango: 35-55	1	Nivel socioeconómico; Escolaridad: nivel educativo	Velocidad psicomotora, atención sostenida y razonamiento lógico: WAIS (DSC)	En el grupo de baja posición laboral, los sujetos que consumían en promedio 21 copas o más a la semana, tuvieron peor desempeño cognitivo que los que consumían de 4 a 14 copas semanales. En los participantes con baja escolaridad, también se observó peor desempeño cognitivo. No se observó relación entre el consumo de alcohol y el desempeño cognitivo en los grupos socioeconómicos intermedios o alto…	Longitudinal: Se registró el consumo de alcohol anualmente a partir de 1992	Observacional	NO
78	Lifshitz-Vahav, Shnitzer, & Mashal, (2015)	98	2015	SI	P	O	Síndrome de Down	32	40.89 (8.96) rango: 25-55	1	Actividades de ocio: LLPI (the cognitive activity scale, the leisure activity scale).	Edad mental: PPVS; Nivel Cognitivo; Inteligencia fluida: RPCM. Inteligencia cristalizada: p-VFT, CVM (Sinónimos, Comprensión de metáforas verbales convencionales); Comprensión del idioma.	La participación en actividades recreativas contribuyó a la fluidez verbal, mientras que la participación en actividades cognitivas tuvo un efecto positivo sobre la mayoría de las pruebas (de inteligencia cristalizadas y de inteligencia fluida).	Transversal	Observacional	NO
80	Gale, Deary, Cooper, & Batty, (2012)	99	2012	NO	P	O	Dolor Crónico Generalizado	6902	11 (0)	1	Nivel socioeconómico del padre; Escolaridad: nivel educativo; Variable Antropométrica: IMC.	Habilidades cognitivas: General ability test; Dolor: CWP.	Un menor CI a los 11 años se relacionó positivamente con mayor riesgo de dolor crónico generalizado a los 45 años. Esta relación estuvo moderada por un bajo nivel socioeconómico y un alto índice de masa corporal.	Longitudinal: 1ra ev:11años; 2da ev:45 años	Observacional	NO
81	Alipour & Goldust, (2016)	100	2016	NO	P	O	Hipertensión	248	78.76 (12.02)	1	CRC; Escolaridad: años de escolaridad (Índice de Reserva Cognitiva)	Atención: TMT-A; Función ejecutiva: TMT-B, p-VFT; Memoria: WAIS-III (DS); Estado cognitivo: MMSE	Los valores más altos de presión arterial sistólica se asocian con peor memoria y funciones ejecutivas. Una PA diastólica más alta fortalece esta asociación. La RC se predice por una mayor PA sistólica asociada a una PA diastólica más baja.	Transversal	Observacional	SÍ: 252 controles
82	Kesler, Tanaka, & Koovakkattu, (2010)	101	2010	SI	P	C&T	Leucemia (sobrevivientes de leucemia linfoblástica aguda pediátrica)	28	12 (4.6) rango: 5-19.8	1	Nivel educativo de la madre: años de escolaridad de la madre	Dependiendo de la edad del individuo usaron distintas pruebas de Weschler (WPPSI-III, WISC-IV, WAIS-III). Comprensión verbal (vocabulary); Memoria de trabajo (LNS); Velocidad de procesamiento (symbol search); Razonamiento Perceptual (Matrix reasoning); Funciones ejecutivas: CCT; Memoria declarativa visual y verbal: WRAML (verbal learning and picture memory); Procesamiento visoespacial: M-FVPT-III…	Se observaron menores volúmenes de sustancia blanca y más bajos puntajes en las pruebas cognitivas en el grupo con leucemia. En este grupo una mayor educación materna se relacionó con menor sustancia blanca y mayor sustancia gris, mientras que en el grupo control se asoció a mayor sustancia blanca y gris. La educación materna se correlacionó positivamente con la memoria de trabajo y la memoria ve…	Transversal	Observacional	SÍ: 31 controles
83	Kesler, Gugel, Huston-Warren, & Watson, (2016)	102	2016	SI	P	C&T	Leucemia (sobrevivientes de leucemia linfoblástica aguda pediátrica)	32	rango: 5-19	1	Nivel educativo de la madre: años de escolaridad de la madre	Neuroimagen: DTI; Velocidad de procesamiento: WISC-IV (coding); Comprensión verbal: WISC-IV (vocabulary); Memoria de trabajo: WISC-IV (LNS); Razonamiento perceptual: WISC-IV (matrix reasoning); Aprendizaje visual: WRAML (picture memory); Lenguaje: WRAML (verbal learning subtests)	El nivel educativo de la madre ayudó a predecir el deterioro cognitivo entre los jóvenes supervivientes de leucemia. Es decir, aquellos con niveles de educación materna más altos (mayor RC) mostraron una ventaja relativa respecto a aquellos con menor reserva. La conectividad de regiones parietal, frontal, hipocampal, amígdala, talámica y occipital estaba alterada en el grupo experimental respecto…	Transversal	Observacional	SÍ: 40 controles
84	Ownsworth, Dwan, Chambers, Walker, & Shum, (2014)	103	2014	SI	P/S	C&T	Tumor cerebral	73	47.61 (12.1) rango: 21-65	1	CI premórbido: WTAR	Atención: DS; Memoria: HVLT-R; Funciones visoespaciales: ROCF; Lenguaje: VFT; Funciones ejecutivas: TMT-A, TMT-B; Calidad de vida: FACT; Depresión: DASS	Los pacientes con CI premórbido alto y bajo desempeño neuropsicológico global, reportaron mayor bienestar que aquellos con CI premórbido promedio o bajo y bajo despempeño neuropsicológico global. Un mayor desempeño neuropsicológico global se relacionó con mayor bienestar funcional independientemente del CI premórbido.	Transversal	Observacional	NO
85	Gonzalez et al., (2015)	104	2015	NO	P	C&T	Cáncer de próstata	58	67.31 (8.87)	1	CI total: NART	Memoria verbal, memoria visual, atención, funciones ejecutivas	El Grupo Experimental (cáncer y tratamiento hormonal) mostró mayor deterioro cognitivo a 6 y 12 meses. La RC no moderó el impacto negativo de la terapia sobre la cognición.	Longitudinal	Cuasi-experimental; tratamiento: terapia de privación de andrógenos	SÍ: 2 grupos control: 84 CP con prostactectomía y sin tratamiento hormonal; 88 Normales
86	Fortune, Walsh, & Richards, (2016)	105	2016	SI	P	N	Traumatismo craneoencefálico	61	46.9 (12.9)	2	Escolaridad: nivel educativo según Educación formal (Secundaria, Preparatoria, Universidad); CIQ	Severidad del daño	Entre los sobrevivientes en neurorehabilitación de una lesión cerebral adquirida, los aspectos de la discapacidad se ven afectados diferencialmente por los efectos de la RC asociada a la educación. Los participantes con mayores logros educativos previos a la lesión mostraron mejoras significativamente mayores en su ajuste general al evento.	Transversal	Observacional	NO
87	García-Molina et al., (2013)	106	2013	SI	P/S	N	Traumatismo craneoencefálico (moderado o grave; i.e., Glasgow <13)	RC alta: 46; RC baja: 38	34.48 (12)	2	Escolaridad: nivel educativo; Ocupación	Estado Funcional: PCRS (actividades de la vida diaria, procesos cognitivos, habilidades sociales, emociones)	Los pacientes con alta RC tuvieron mejor recuperación.	Transversal	Observacional	NO
88	Karver et al., (2014)	107	2014	SI	P	N	Traumatismo craneoencefálico (TBI) complicado de leve a severo	132	CAPS: 14.40 (1.68); IRC:14.67 (1.77)	2	CI total: WASI (estimación de CI total a partir de las subescalas Vocabulary y Matrix reasoning).	Funciones ejecutivas: BRIEF, CBCL, CAFAS.	La RC constituye un moderador potencial de los efectos de las intervenciones para TCE pediátrico. Los adolescentes con menor RC tienen más potencial para beneficiarse de la intervención CAPS (entrenamiento en resolución de problemas) que aquellos con mayor RC.	Longitudinal. 2 grupos (tratamientos): CAPS e IRC	Cuasi-experimental	NO
89	Schneider et al., (2014)	108	2014	SI	P	N	Traumatismo craneoencefálico moderado/severo que recibieron rehabilitación	769 (<12 años de educación: 185; 12-15 años de educación: 390; >16 años de educación: 194)	<12 años de educación: 46.9 (16.8); 12-15 años de educación: 48.6 (17.8); >16 años de educación: 54.3 (17.7)	2	Escolaridad: nivel educativo con 3 niveles (Bajo: < 12 años, Medio: 12-15 años; Alto >16 años).	Recuperación total de la discapacidad: una puntuación de cero en la DRS un año después del traumatismo.	De los 214 pacientes que alcanzaron una puntuación de cero en la DRS, 18 tenían >12 años de educación, 120 entre 12 y 15 años y 76 más de 16 años. En el análisis de regresión logística multivariada los años de educación se asocian independientemente con la recuperación total.	Transversal retrospectivo	Observacional	NO
90	González-Fernández et al., (2011)	109	2011	SI	P/S	N	Accidente vascular encefálico con afasia	173	61.2 (15.8)	2	Escolaridad: nivel educativo con 2 niveles (Bajo: ≤ 12 años; Alto: > 12 años); Ingreso económico promedio.	Lenguaje: Batería de lenguaje (administrada en las primeras 24 h); Neuroimagen: iRM (volumen sistólico inicial)	Pacientes con más años de educación obtuvieron mejores puntajes en las pruebas de lenguaje, mostrando la RC un papel protector contra la afasia.	Transversal	Observacional	SÍ: 62 hospitalizados por ataque de isquemia transitorio
91	Elkins et al., (2006)	110	2006	NO	P	N	Infarto cerebral	Preparatoria Incompleta: 938; Prep Completa: 1016; Carrera técnica: 845; Universidad: 823	Preparatoria Incompleta: 75.7 (5.4); Prep completa: 74.4 (4.7); Carrera Técnica: 74.9 (5.0); Universidad: 75.3 (5.4)	2	Escolaridad: nivel educativo (Preparatoria Incompleta, Preparatoria Completa, Carrera técnica, Universidad).	Estado cognitivo: MMSE; Aprendizaje y memoria: DSST; Neuroimagen: iRM	Un infarto definido por iRM resultó en mayor disminución de la función cognitiva general entre los individuos en el grupo de logros educativos más bajos en comparación con aquellos con más educación. Este hallazgo fue robusto tanto en el análisis transversal como en el longitudinal.	Transversal y Longitudinal: 2 evaluaciones (a los 5 años después)	Observacional	NO
92	Gutierrez-Galve et al., (2014)	111	2014	NO	P	P	Psicosis (primer episodio)	27	25.9 (6.5) rango: 16-43	2	CI premórbido: NART	Diagnóstico: DIP-DM, SANS, SAPS, YMRS, HAMD, edad de inicio y duración de psicosis no-tratada, escalas de uso de drogas y alcohol, destreza manual y función social; CI actual: WAIS-III; Funciones ejecutivas: CANTAB (working memory span, working memory manipulation, stocking); Memoria Verbal: RAVLT; Neuroimagen: iRM (volumen cerebral, grosor cortical)	Se observó adelgazamiento progresivo de la corteza frontal superior e inferior (y en menor medida de la corteza temporal superior). Sólo el aprendizaje verbal cambió con el tiempo (mejoró). Pacientes con menor RC podrían ser más vulnerables a desarrollar anormalidades corticales al ser expuestos a medicación.	Longitudinal (pacientes sometidos a tratamiento antipsicótico a lo sumo 12 semanas), seguidos durante 2 años	Observacional	SÍ: 25 Sanos
93	Kontis, Huddy, Reeder, Landau, & Wykes, (2013)	112	2013	SI	P/S	P	Esquizofrenia	134	38.07 (10.65)	2	CI premórbido: NART o WTAR; Vocabulario: WAIS-III (puntaje crudo de la subescala Vocabulary)	Memoria de trabajo: WAIS-III (DS subtest); Flexibilidad cognitiva: WCST, Planeación: MSET	En jóvenes (<40 años) hubo efecto significativo del tratamiento CRT sobre la memoria de trabajo y una mayor RC (mayor CI premórbido) estuvo asociada a mejor memoria de trabajo independientemente del tratamiento. La edad es un factor limitante para la eficacia del tratamiento CRT.	Longitudinal	Cuasi-experimental; CRT n=85	SÍ: 49 con tratamiento usual
94	Jones et al., (2006)	113	2006	NO	P	P	Delirium en ancianos hospitalizados por causas no mentales.	491	Estudio1: 79 (6); Estudio2: 80 (7)	2	Escolaridad: años de escolaridad	Presencia de delirium: CAM.	Los adultos mayores con menor nivel de instrucción tienen un mayor riesgo de presentar delirium postoperatorio.	Longitudinal	Observacional	SÍ: 421 personas que internaron con demencia profunda, afasia, coma, etc.
95	Ahles et al., (2010)	114	2010	SI	P	C&T	Cáncer de mama: Expuestos y no a quimioterapia	Expuestos: 60, No expuestos: 72	Expuestos: 51.7 (7.1); No expuestos: 56.6 (8.3)	2	Lectura: WRAT-3 (Puntaje en lectura)	Habilidad Verbal: WASI (Vocabulary), D-KEFS (VFT); Memoria Verbal: CVLT-II, WMS-III (LM I y II); Memoria Visual: WMS-III (Faces I y II); Memoria de Trabajo: PASAT; Velocidad de Procesamiento: WAIS-III (Codificación Dígito-Símbolo); D-KEFS (TMT), D-KEFS (Test de Interferencia Color-Palabra); Clasificación: D-KEFS (Test de clasificación); Distractibilidad y tiempo de reacción: CPT; Autoreporte de d…	Participantes con baja RC expuestos a quimioterapia, tuvieron una baja ejecución en Velocidad de procesamiento comparados con pacientes no expuestos y controles. La edad y la RC pretratamiento se relacionaron con un deterioro posttratamiento en los sujetos expuestos a quimioterapia y esta quimioterapia tuvo un impacto a corto plazo en la habilidad verbal.	Transversal	Observacional	SÍí: 45 controles
96	Basso & Bornstein, (2000)	115	2000	NO	P	I	Virus de Inmunodeficiencia Humana: Positivo	VIH Asintomático: 49, VIH Sintomático: 24, SIDA: 28	CI promedio: 31.97 (7.09); CI por arriba del promedio: 36.71 (7.88)	2	CI premórbido: WAIS-R; Escolaridad: años de escolaridad; Ocupación (Índice de Reserva Cognitiva)	Funciones ejecutivas: WCST, Ruff Figural Fluency Test, COWAT, TMT-A y TMT-B.	Independientemente del estado de la enfermedad, los participantes con coeficiente intelectual por encima del promedio no mostraron disminuciones en las medidas de la función ejecutiva a lo largo del tiempo. La inteligencia premórbida modula la disminución de la función neuropsicológica en pacientes con un estado de VIH estable.	Longitudinal: 2 mediciones (a los 12 meses)	Observacional	SÍ: 54 VIH negativos
97	Ropacki, Bert, Ropacki, Rogers, & Stern, (2007)	116	2007	NO	P/S	O	Cardiopatía después de injerto de bypass en la arteria coronal	Alta reserva cognitiva: 22; Baja reserva cognitiva: 20	Alta reserva cognitiva: 61.6 (5.9); Baja reserva cognitiva: 65.9 (9,7) rango: 18-90	2	CI estimado: OPIE, Ocupación: logros laborales	Atención, concentración, aprendizaje y memoria, velocidad psicomotora: WAIS-III (DS, DSC, LNS, Vocabulary), VFT (FAS), CF, HVLT-R, WMS-III (Mental Control), RMT (Short Story Subtest), ROCF, BQSS, TMT-A, TMT-B.	No hubo diferencias entre grupos de RC en la evaluación preoperatoria. En la evaluación postoperatoria, el grupo con alta RC mostró mayor deterioro en memoria de trabajo y funciones ejecutivas en comparación con el grupo con baja RC.	Longitudinal: evaluación preoperatoria y postoperatoria (2-6 semanas después)	Observacional	NO
98	Saczynski et al., (2014)	117	2014	SI	P/S	P	Delirium postoperatorio	Con delirium: 135; Sin delirium: 431	Con delirium: 77.5 (5); Sin delirium: 76.5 (5.3)	3	Escolaridad: años de escolaridad; Actividades cognitivas a lo largo de la vida: CAS; Ocupación: DOT, WTAR (complejidad y demanda laboral)	Delirium: CAM, DSI; Funcionamiento físico: ADL, IADL; Estado general de salud: SF-12; Depresión: GDS-15; Deterioro cognitivo: IQCODE	Hubo una asociación entre el WTAR y el riesgo para desarrollar delirium. Un mejor desempeño de 1.5 desviaciones estándar se asoció con 38% de reducción de riesgo para desarrollar delirium.	Longitudinal: evaluación preoperatoria y postoperatoria. No se especifica el tiempo entre evaluaciones.	Observacional	NO
99	Paulson, Bowen, & Lichtenberg, (2014)	118	2014	SI	P	P	Depresión (síntomas depresivos)	1355	84.8 (4.1)	3	Escolaridad: años de escolaridad	Depresión: CES-D; Cognición general: TICS	En mujeres mayores, mayor nivel educativo predice menores síntomas depresivos en la evaluación basal, pero este efecto disminuye con el tiempo. La educación y la carga cerebrovascular (riesgo) predicen síntomas depresivos clínicamente significativos.	Longitudinal: 4 evaluaciones en 6 años	Observacional	NO
100	Legendre, Stern, Solomon, Furman, & Smith, (2003)	119	2003	NO	P	P	Depresión tratada con terapia electroconvulsiva bilateral	Alta RC:27; Baja RC:23.	AltaRC: 40.96 (12.50); BajaRC: 45.74 (13.79)	3	Escolaridad: nivel educativo (2 niveles); Ocupación: HSOL	Memoria: RMT (Short Story)	La RC protege del deterioro de memoria producido por la terapia electroconvulsiva	Longitudinal	Observacional	NO
101	Koenen et al., (2009)	120	2009	SI	P	P	Trastornos psiquiátricos: esquizofrenia, depresión y ansiedad	1037	11 evaluaciones Infancia: 3, 5, 7, 9,11,13,15; Adultez: 18, 21, 26, 32	3	CI total: WAIS-R (aplicado a los 7, 9 y 11 años).	DIS y además: diagnóstico de acuerdo a DSM-III-R a los 18 y 21 años; diagnóstico de acuerdo a DSM-IV a los 26 y 32 años.	Mayor CI en la infancia se asoció a menor riesgo de desarrollar trastorno del espectro de esquizofrenia, depresión o ansiedad en la adultez, y a menor comorbilidad y persistencia de depresión o tendencia a persistencia del trastorno de ansiedad generalizada. Sin embargo, un CI más alto en la niñez predijo un mayor riesgo de manía en la adultez.	Longitudinal 11 evaluaciones: Infancia: 3, 5, 7, 9,11,13,15 años; Adultez: 18, 21, 26, 32 años	Observacional	NO
102	Hindle et al., (2015)	121	2015	SI	P	N	Enfermedad de Parkinson	525	68 (10.3) rango: 32-94	3	Escolaridad: nivel educativo (se construyó un índice con el autorreporte de años en la escuela, la presencia de educación superior y el máximo nivel de estudios alcanzado); Ocupación: NSSEC-5; Relaciones sociales actuales (visitas, llamadas telefónicas).	Cognición global: MMSE; y CDR; ACE-R (atención/orientación, memoria, fluidez, lenguaje y visoespacial); Severidad de la enfermedad: UPDRS; Presencia de ansiedad o depresión: HADS.	Mayor RC reduce el riesgo de desarrollar demencia en pacientes con Parkinson. No hubo asociación entre las variables cognitivas a los 4 años y el nivel educacional, la clase social o las medidas de relación social; sin embargo al considerar sólo a los que al inicio estaban mejor cognitivamente (n=258), los altos niveles de educación se relacionaron con mayor puntaje en MMSE, ACE-R y otras variabl…	Transversal y Longitudinal (seguimiento a 4 años)	Observacional	NO
103	Schwartz et al., (2015)	122	2015	SI	P	N	Esclerosis Múltiple	CIS: 67; MS RR: 358; MS Progressive: 109	CIS: 39.45 (10.88); MS RR: 44.16 (10.71); MS progressive: 53.91 (8.69)	3	Cuestionario de actividades generadoras de reserva (incluye actividades físicamente extenuantes y no extenuantes); Nivel ocupacional; Escolaridad: nivel educativo.	Diferencias entre grupos de acuerdo con el tipo de esclerosis múltiple presentado: pacientes con síndrome clínicamente aislado: CIS; pacientes remitente-recurrente: MS RR; Pacientes progresivos: MS Progressive; y controles sanos: HC	Los pacientes presentaron menores niveles de actividades realizadas en el pasado que el grupo control. Los pacientes con esclerosis múltiple realizaban menor cantidad de actividades generadoras de RC que los participantes del grupo control.	Transversal	Observacional	NO
104	Hosseini, Flora, Banwell, & Till, (2014)	123	2014	NO	P	N	Esclerosis Múltiple de inicio pediátrico	35	7-18 años en la primera evaluación	3	CI total: WASI; Nivel socioeconómico de los padres	Cognición: SDMT, TMT	Ni el CI ni el nivel socioeconómico tuvieron relación con el deterioro cognitivo de estos pacientes. Sin embargo, la edad sí: la menor edad al inicio de la enfermedad se asoció a mayor deterioro cognitivo.	Longitudinal	Observacional	NO
105	Verghese et al., (2009)	124	2009	SI	P	N	Deterioro cognitivo vascular (VCI)	Primera evaluación: 401 adultos sin deterioro cognitivo ni demencia; Seguimiento: Sin VCI: 330; VCI sin demencia: 49	Sin VCI: 78.7 (3); VCI sin demencia: 80 (2.9)	3	Actividad Física: PAS; Actividad mental: CAS	Cognición general: Test de Blessed; Inteligencia: escalas Wechsler; Memoria: FOME; Memoria semántica: CF test; Patología vascular	71 pacientes desarrollaron deterioro cognitivo vascular (49 sin demencia). El incremento en la puntuación del CAS (1 punto) se asoció a una reducción del 7% del riesgo de padecer deterioro cognitivo vascular. Los pacientes con mayores niveles de actividades cognitivas de esparcimiento presentaron una reducción del 46% del riesgo de padecer deterioro cognitivo vascular sin demencia comparados con …	Longitudinal	Observacional	NO
106	Mirza et al., (2016)	125	2016	SI	P	N	Enfermedad Vascular Cerebral	Escolaridad alta: 1920, Eescolaridad intermedia: 5342, Escolaridad baja: 5299	Educación alta: 60 (8.2); Educación intermedia: 63.3 (8.8); Educación baja: 67.8 (9.9)	3	Escolaridad: nivel educativo (3 niveles)	Demencia: MMSE, GMS, CEMDE, DSM-III; Funciones ejecutivas: SCWT; Velocidad de procesamiento: LDST; Fluidez verbal: VFT; Memoria: WLT; Funciones motoras finas y coordinación: PP	El riesgo de desarrollar demencia después de un EVC fue mayor en personas con baja escolaridad, seguidas del grupo intermedio. Este efecto solamente fue significativo en hombres.	Longitudinal: línea base y a los 2 años	Observacional	NO
107	Bieliauskas et al., (2007)	126	2007	NO	P	I	Hepatitis C	Deterioro cognitivo: 63; Sin deterioro: 135	Deterioro cognitivo: 51 (6); Sin deterioro cognitivo: 50 (8)	3	CI: SILS; Escolaridad: años de escolaridad; Ocupación	Intelecto General: SILS (Subtests de Vocabulario y Abstracción); Memoria Verbal: SRT; Memoria no verbal: CVMT; Velocidad y eficiencia del procesamiento de la información: WAIS-R (DS), SDLT; Seguimiento Visomotor: TMT-A, TMT-B, WAIS-R (Digit Symbol).	Hubo un riesgo significativamente mayor de deterioro en el rendimiento de las pruebas neuropsicológicas en individuos con RC menor.	Transversal	Observacional	NO
108	Sabbath et al., (2012)	127	2012	NO	P	O	Exposición ocupacional a solventes	Escolaridad baja: 2412; Escolaridad alta: 1722	59 rango: 55-63	3	Escolaridad: nivel educativo (2 niveles)	Funciones ejecutivas y velocidad psicomotora: WAIS (DSC)	La exposición a solventes fue mayor en el grupo con baja escolaridad. En este grupo se observó relación entre la exposición a lo largo de la vida a cada tipo de solvente y el riesgo de deterioro cognitivo. Un menor tiempo transcurrido desde la última exposición a solventes también predijo peor cognición en el grupo de baja escolaridad. No se encontró relación entre exposición a solventes y cognic…	Transversal	Observacional	NO
109	Galioto, Alosco, Spitznagel, Stanek, & Gunstad, (2013)	128	2013	SI	P	O	Obesidad sin condiciones médicas o psicológicas importantes	81	47.62 (17.99)	3	CI premórbido: Adaptación del SWT	Sensorimotor; Atención; Funciones Ejecutivas; Lenguaje; Memoria: IntegNeuro Battery	Mayor RC atenúa el efecto negativo de la obesidad sobre la cognición.	Transversal	Observacional	SÍ: 288 peso normal; 210 sobrepeso

## Sheet: Hoja1
11	Kesler SR, Adams HF, Blasey CM, Bigler ED. Premorbid intellectual functioning, education, and brain size in traumatic brain injury: an investigation of the cognitive reserve hypothesis. Appl Neuropsychol. 2003;10(3):153-62.
